# Supplementary material for: Multivariate chemometric design of nitric oxide-releasing chitosan nanoparticles for skin-related biomedical applications
Source: Royal Society of Chemistry journal article supplement (doi:10.1039/d5nr01044f), 2025-01-01
Supplement: d5nr01044f1.xlsx [file d5nr01044f1.xlsx]

## Sheet: Table 3 and Table 4
Experiment	Y1	Y2	Y3	Y4	Y5	Y6	Y7	Y8	Y9
1	179.3	0.244	19.1	1.1	1.1	1	1	1.1	1
2	287.1	0.459	12.5	2.4	1.5	1	3.5	1.5	1.1
3	189.2	0.929	38.9	0.9	1.1	1	1.4	1	0.9
4	167.9	0.243	14.8	1.2	1.2	1.1	1.3	1.3	1
5	240.8	0.547	39.3	1	1.7	1	1.2	1.8	0.9
6	334.6	0.465	15.6	1	1	1.4	1	0.9	1.6
7	99.95	0.225	16.8	1.3	1.2	1.1	1.1	0.9	1.1
8	146	0.512	29.4	1	0.8	1.1	1.1	0.8	0.9
9	145.1	0.821	26.8	0.9	0.4	0.8	1.3	0.8	0.9
10	250.9	0.982	31.1	0.7	0.6	1	0.8	0.5	1.1
11	146.6	0.167	18.3	1.1	1.3	0.9	1.1	1.1	0.8
12	116.8	0.449	18.2	1.4	1	1	1.5	0.8	0.7
13	169.2	0.403	25.4	1	1	1.1	1	1	1.2
14	175.1	0.359	26.7	1	0.9	1	1	1	1.1
15	172.7	0.342	27.5	1	1	0.8	1	1	1.1
Y1: average diameter immediately post-synthesis; Y2: PDI immediately post-synthesis, Y3: ZP immediately post-synthesis, Y4: normalized average diameter 7 days post-synthesis at room temperature; Y5: normalized PDI 7 days post-synthesis at room temperature; Y6: normalized ZP 7 days post-synthesis at room temperature; Y7: normalized average diameter 7 days post-synthesis at 4 ºC; Y8: normalized PDI…

## Sheet: Figure 2 A, B, and C
Experiment	Y1	Y2	Y3	Y4	Y5	Y6	Y7	Y8	Y9
1	125.4	0.321	9.63	1.2	0.9	1.1	1.3	1	1
2	157.1	0.843	29.9	0.9	0.9	1	1.1	0.9	1
3	107.7	0.233	11.3	1.1	0.9	1.1	1.1	1	1
4	125.3	0.713	27.4	1	0.9	1	1.1	0.9	0.9
5	112.7	0.324	11.9	1.2	0.9	1	1.3	1	0.9
6	111.9	0.537	29.3	1	0.8	1	1.1	0.8	0.9
7	131.5	0.718	19.4	1	0.8	1	1	0.9	1
8	105.7	0.36	23.5	1	0.8	1	1	0.9	0.9
9	95.64	0.309	19.2	1	1	1	1.1	1	1.1
10	105.2	0.389	16.5	0.9	0.9	0.9	1	0.9	1
11	96.3	0.298	17.7	1	0.9	1.1	1	0.9	1.2
Y1: average diameter immediately post-synthesis; Y2: PDI immediately post-synthesis, Y3: ZP immediately post-synthesis, Y4: normalized average diameter 7 days post-synthesis at room temperature; Y5: normalized PDI 7 days post-synthesis at room temperature; Y6: normalized ZP 7 days post-synthesis at room temperature; Y7: normalized average diameter 7 days post-synthesis at 4 ºC; Y8: normalized PDI…

## Sheet: Figure 2D
Time (min)	E1 (15 mM)						E2 (15 mM)						E3 (15 mM)						E4 (15 mM)						E5 (15 mM)						E6 (15 mM)						E7 (15 mM)						E8 (15 mM)						E9 (15 mM)
0	0	0	0	0	0	0	0	0	0	0	0	0	0	0	0	0	0	0	0	0	0	0	0	0	0	0	0	0	0	0	0	0	0	0	0	0	0	0	0	0	0	0	0	0	0	0	0	0	0
20	4.7	3.1	2.7	8.2	6.2	7.3	4.1	3.2	4.9	5.1	6.4	4.3	4.6	4.7	5.3	6.6	5.8	4.4	3.1	5.2	3.6	5.9	6	5.1	3.2	4.9	5.2	5.6	5.6	4.9	3.1	5.3	5.9	5.3	5.8	5.2	2.5	3.1	4.6	5.3	4.9	4.8	3	4.3	4.8	4	4.9	6.6	3.8
40	8	6.3	12.3	11.6	13.8	12.6	7.6	7	9	8.7	8.5	6.4	8.5	9.3	10.6	11.9	11	10	6.8	10.4	8.3	11.2	12.1	10.2	6.5	9.7	10.3	11.9	12.5	10.4	6.2	9.9	11.8	10.5	11.5	10.3	5	6.8	9.3	10	12.5	10.3	5.9	9.3	9.7	8.7	9.8	11.3	7
60	12.7	9.4	13.7	15.8	17.9	15.9	9.7	11.5	13.2	15.9	14.2	10	11.8	14.7	16.6	17.2	16.9	15	10.5	14.9	13.7	16.4	17.4	15.3	10.4	20.1	14.8	19.6	18.8	13.9	9.3	14.5	16.3	15.8	16.7	15.5	8.1	11.1	13.9	14.7	10.4	12.4	8.9	14.2	15.2	13.9	15.2	15.9	10.8
80	15.3	12.6	17.8	20.5	22.8	21.9	15.9	15.3	18.1	20.3	19.1	12.1	15.7	19.3	21.9	22.5	21.4	19.4	13.6	19.5	19	22.4	24.2	21	14.3	19.4	20	22.4	25	18.8	13	19.1	21.6	22.4	22.4	20	11.3	15.4	19.2	19.3	16.7	16.6	12.4	18.5	20.6	19.1	20.7	20.5	14.6
100	18	16.4	21.2	24.7	26.9	25.2	20.7	19.7	22.2	24.6	23.4	19.3	19	22.7	27.2	31.8	26.6	23.8	17.3	24	24.4	27	26.8	25.5	16.9	25	25.8	28.7	28.5	24.3	16	24.3	29.4	27.6	28.8	25.2	14.4	19.8	23.2	27.3	22.2	21.4	16	24.1	25.5	24.3	25.6	25.2	18.4
120	21.3	18.2	24.7	28.1	31	28.5	20.7	23.6	27.1	29	28.4	24.3	22.2	29.3	31.8	34.4	29.2	28.1	20.4	30.5	29.8	32.2	32.9	29.9	20.1	29.2	32.9	33.6	33.3	28.5	19.8	30.3	32	32.9	34	29.7	17.5	24.7	27.8	31.3	25.7	24.8	19.5	27.8	30.3	28.9	30.5	30.5	21.5
140	24	17.6	28.8	30.8	34.5	31.1	22.8	26.8	32.6	33.3	31.9	27.9	26.1	34	37.1	39.1	33.1	33.8	23.5	33.8	35.1	37.5	38.3	34.4	24	33.3	37.4	38.5	38.2	33.3	22.8	36.2	37.3	36.8	37.2	33.5	20.6	27.8	32.5	36	29.9	29	23.7	36.4	38.2	34.1	34.1	34.4	25.9
160	26	26.4	31.5	34.9	37.9	35.1	26.9	29.9	35.4	37.7	36.2	31.4	32.7	38	40.4	43	38.3	36.3	27.2	38.3	40.5	42.1	42.3	36.9	28.6	37.5	41.9	43.4	42.4	37.5	26.5	40.1	41.8	41.4	41.7	38.1	23.1	31.5	37.1	40	34	33.1	27.2	38.3	41.8	38.7	39	39.1	29.1
180	28.7	30.2	34.9	37.7	40.7	37.1	27.6	35.7	38.9	41.3	39.7	34.3	30.7	42	45	47.7	41.6	40	29.6	41.6	45.8	46.7	46.3	41.4	31.2	42.4	44.5	48.3	46.5	41.7	29	43.4	46.4	46.1	45.5	41.9	26.3	33.3	41.7	44.7	37.5	36.6	30.8	42.6	46.7	43.9	43.9	42.4	32.3
200	31.3	32.7	38.4	40.4	42.8	39.7	30.3	38.2	42.4	44.9	42.6	37.1	34	46	49	51.7	45.5	43.8	32.7	46.1	49.4	50	50.3	44.6	33.8	45.8	48.4	51	50.7	44.4	32.7	47.4	50.3	50	49.4	45.2	29.4	42.6	45.7	49.3	41.7	39.3	34.3	46.9	50.3	48	47.6	45.7	36.1
220	34	35.8	40.4	43.2	45.5	41.7	33.1	40.1	45.8	48.6	45.4	40	37.3	49.3	53	55	49.4	46.9	36.4	48.7	53	53.3	53.7	47.8	36.4	48.6	52.3	55.2	54.2	47.2	35.2	50.7	53.6	53.9	52.6	47.7	35.6	42.6	49	52.7	45.1	42.1	36.7	50.6	53.9	50.9	51.2	49	39.2
240	36	38.4	43.2	45.2	48.3	43.7	35.2	42.7	48.6	51.4	48.2	42.1	39.9	52	55.6	58.3	51.3	49.4	39.5	51.9	56.5	57.2	57	51.6	39	52.1	55.5	58	56.3	50.7	37	53.9	57.5	57.2	55.8	51	35	45.7	52.3	55.3	47.9	44.8	40.2	53.7	57.6	54.3	54.3	51.7	43
260	38	40.9	44.5	47.3	50.3	45.7	37.2	45.2	51.4	52.9	50.4	44.3	41.8	54.7	58.9	60.9	53.9	51.9	41.4	55.2	59.5	60.5	59.7	53.5	40.9	54.9	58.7	61.5	59	52.8	40.7	57.2	60.8	60.5	59	53.5	37.5	49.4	55.6	58.7	50.7	46.9	41.4	56.8	60.6	57.2	57.3	53.6	45.6
280	40	42.8	47.3	49.3	51.7	47.7	39.3	47.8	54.2	55.8	52.5	47.1	44.4	56.7	61.6	63.6	56.5	53.8	43.8	57.8	62.5	63.2	61.7	55.4	43.5	57.6	61.3	63.6	61.8	54.9	43.2	59.9	63.4	63.2	61.5	56.1	40	51.9	58.3	61.3	53.5	49	45	59.9	63.6	60.7	60.4	56.3	48.1
300	42	44.7	48.6	51.4	53.8	49	40.7	49.7	56.3	58	54.6	48.6	46.4	59.3	63.6	65.6	58.4	56.3	46.3	59.7	64.9	65.1	63.8	58	45.5	59.7	63.9	66.4	63.9	56.9	45.1	61.8	66	65.8	63.5	58.1	41.9	54.3	60.9	64	54.9	51.7	47.3	62.3	66.1	63	62.2	58.3	50.6
320	43.3	47.2	50.7	52.7	55.2	49.7	42.8	51.6	58.3	60.1	56	50.7	47.7	61.3	65.6	67.5	60.4	58.1	47.5	61.7	67.3	67.8	66.4	59.2	47.4	61.8	66.5	68.5	66	59	47.5	64.5	68	67.8	65.4	60	44.4	56.8	62.9	66	56.9	53.8	50.3	64.2	68.5	65.3	64	60.3	52.5
340	44	48.4	52.1	54.1	57.2	51.7	44.1	53.5	60.4	61.6	58.2	52.1	49	62.7	67.5	69.5	62.3	59.4	49.4	63.6	69	69.1	67.8	61.1	49.4	63.9	67.7	70.6	68.1	60.4	49.4	66.4	69.9	70.4	67.3	61.3	46.3	58.6	65.6	68.7	59.7	55.2	51.5	66.7	70.9	67.6	65.9	61.6	54.4
360	45.3	49.7	53.4	55.5	57.9	52.3	45.5	55.4	61.8	63	59.6	53.6	51	64.7	69.5	70.9	63.6	61.3	50.6	65.6	70.8	71.1	69.1	62.4	50.6	65.3	69.7	72	69.4	61.8	51.2	67.8	71.9	71.7	69.2	62.6	47.5	60.5	66.9	70	61.1	56.6	53.3	68.5	72.1	68.8	67.7	62.9	56.3
380	47.3	50.9	54.8	56.8	59.3	53.6	46.9	56.7	63.2	64.5	60.3	54.3	52.3	66	70.9	72.2	64.3	62.5	51.9	66.2	72	72.4	70.5	63.7	52.6	67.4	71.6	73.4	70.8	63.2	52.5	69.1	73.2	73.7	70.5	63.2	49.4	62.3	68.9	72	62.5	57.2	54.4	69.8	73.9	70.5	68.9	64.2	57.6
400	48.7	52.2	56.2	58.2	60.7	54.3	48.3	58.6	64.6	65.9	61.7	55.7	53.6	67.3	71.5	73.5	66.2	63.1	53.7	68.2	73.2	73.7	71.8	65	53.9	68.8	72.9	74.8	72.2	65.3	53.7	70.4	74.5	75	71.8	65.2	50.6	63.6	70.2	72.7	63.9	58.6	56.2	71.6	75.2	71.7	70.1	65.6	58.9
[truncated: 23 more columns]

## Sheet: Figure 3A
Size (nm)	Intensity (%)
21.04	0	0	0.1
24.36	0.2	0.3	0.4
28.21	0.8	1.1	1.1
32.67	1.9	2.4	2.2
37.84	3.5	3.9	3.5
43.82	5.4	5.5	5.1
50.75	7.3	7	6.7
58.77	9	8.2	8.1
68.06	10.3	9.2	9.3
78.82	11	9.7	10.1
91.28	11	9.8	10.3
105.7	10.3	9.4	10
122.4	9.1	8.6	9.1
141.8	7.4	7.5	7.8
164.2	5.6	6.1	6.3
190.1	3.8	4.7	4.6
220.2	2.2	3.2	2.9
255	1	2	1.6
295.3	0.3	1	0.6
342	0	0.4	0.1
396.1	0	0.1	0

## Sheet: Figure 3C
Time (h)	GSNO Diffusion (%)
0.5	14.2857	14.2857	14.2857
1	24.3669	23.6732	24.6678
2	44.3179	39.0062	52.0715
4	42.2146	43.2224	46.4675
5	34.6939	39.6568	45.8364
6	29.4295	34.0318	39.3971

## Sheet: Figure 3D
Time (h)	GSNO Diffused (mmol/L)
0.5	0.516829	0.597571	0.700929
1	0.767	0.990214	1.40586
1.5	2.28971	2.13979	2.45671
2	2.37943	2.34586	2.55479
3	2.34714	2.55286	2.60593
4	2.2665	2.59364	2.7705
5	1.86271	2.51593	2.7395
6	1.58007	2.13779	2.42357
8	1.36486	1.22121	2.20321
24	1.19021	1.212	1.17871

## Sheet: Figure 4A
Cell Viability (%)
Controls		GSNO-CSNPs					Free GSNO					CSNPs
Negative	Positive	500 µmol/L	250 µmol/L	100 µmol/L	50 µmol/L	5 µmol/L	500 µmol/L	250 µmol/L	100 µmol/L	50 µmol/L	5 µmol/L	500 µmol/L	250 µmol/L	100 µmol/L	50 µmol/L	5 µmol/L
105.175	63.9624	71.791	86.1999	98.072	93.5566	90.208	74.0233	87.1639	103.349	91.9838	84.5256	105.429	104.515	105.733	98.8838	101.116
96.4485	62.4253	78.691	88.0264	99.2897	94.7742	98.275	78.7418	91.0198	94.3176	96.7022	89.244	92.4404	105.479	101.065	95.1801	95.5353
98.3765	60.3757	79.4013	90.6139	99.1882	97.3617	91.0198	76.5601	90.1573	99.4419	98.8331	89.8021	95.4845	95.5353	96.7022	102.638	96.6514
101.162	68.4885	85.017	99.3385	100.894	101.752	122.457	80.2968	108.94	98.6948	97.1929	106.258	104.005	114.625	94.9937	94.4574	108.296
97.7293	66.4389	89.0935	100.84	96.7102	108.511	112.909	84.0515	110.817	98.5339	102.449	113.284	96.7102	106.151	94.0819	91.99	101.752
101.109	64.8164	85.7143	104.702	102.664	97.5684	111.997	85.4461	98.5339	103.522	104.166	109.637	104.327	107.867	99.0166	98.8021	108.511

## Sheet: Figure 4B
S-nitrosylated Proteins (umol S-NO/L)
Control			Free GSNO 250 uM			GSNO-CSNPs 250 uM			Free GSNO 500 uM			GSNO-CSNPs 500 uM
1.06896	0.906804	1.02433	0.359303	0.403292	0.810863	0.778366	0.597007	0.987379	1.2985	1.3668	1.46027	2.49153	3.25809	4.25444
